# Supplementary material for: WBM-DLNets: Wrapper-Based Metaheuristic Deep Learning Networks Feature Optimization for Enhancing Brain Tumor Detection
Source: MDPI journal article supplement (doi:10.3390/bioengineering10040475), 2023-04-14
Supplement: s1 [file s1]

**Supplementary Materials:**

17

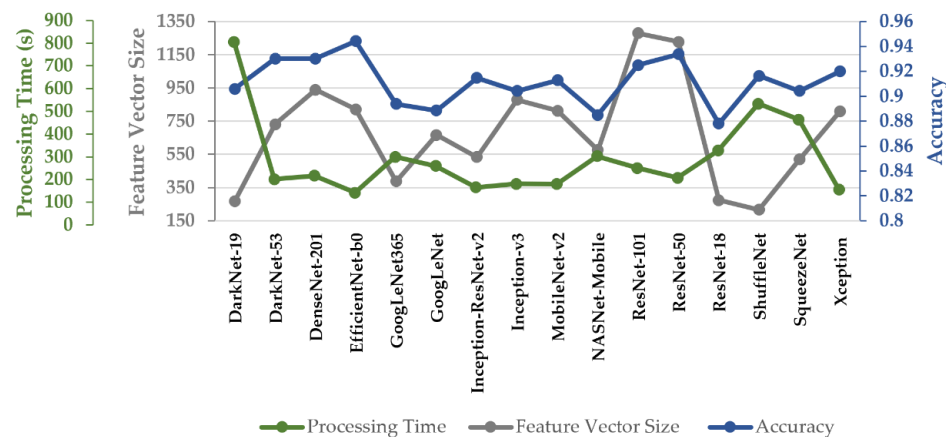

(a)

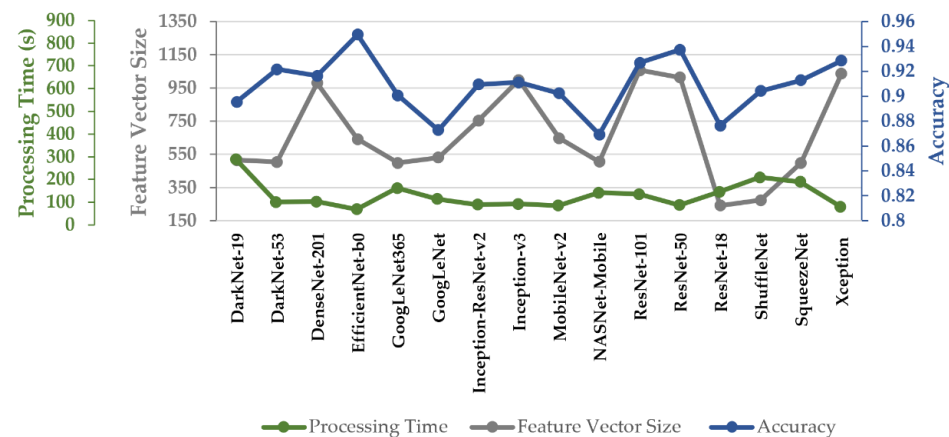

(b)

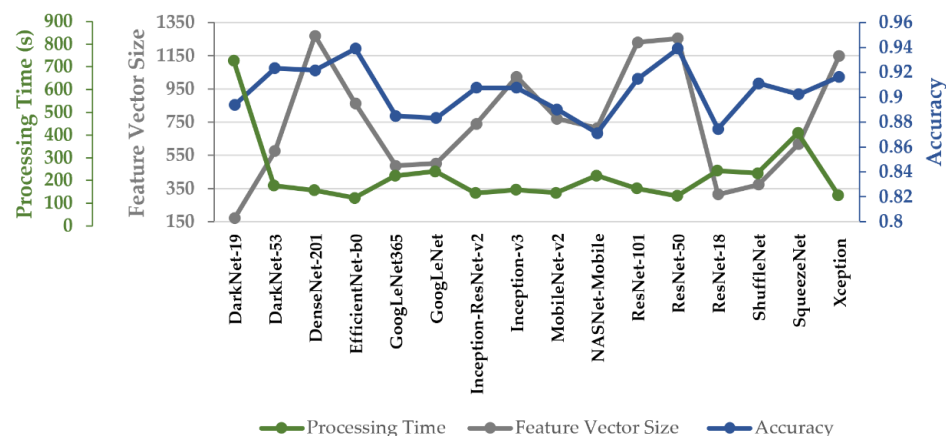

(c)

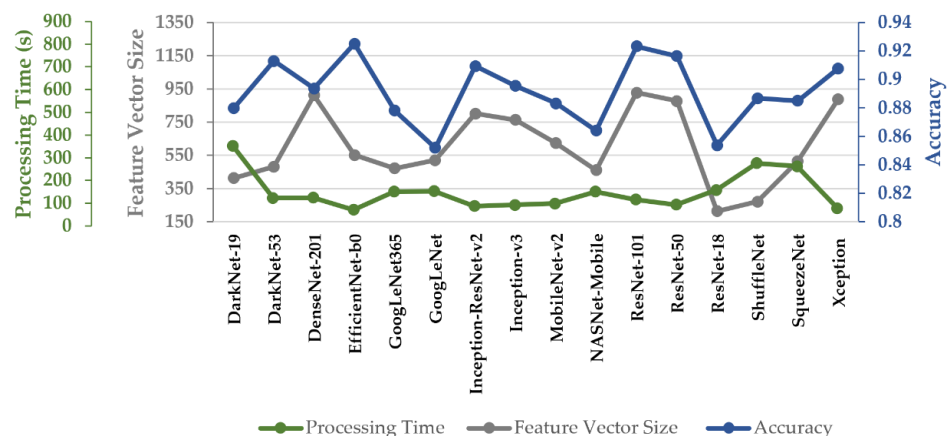

(d)

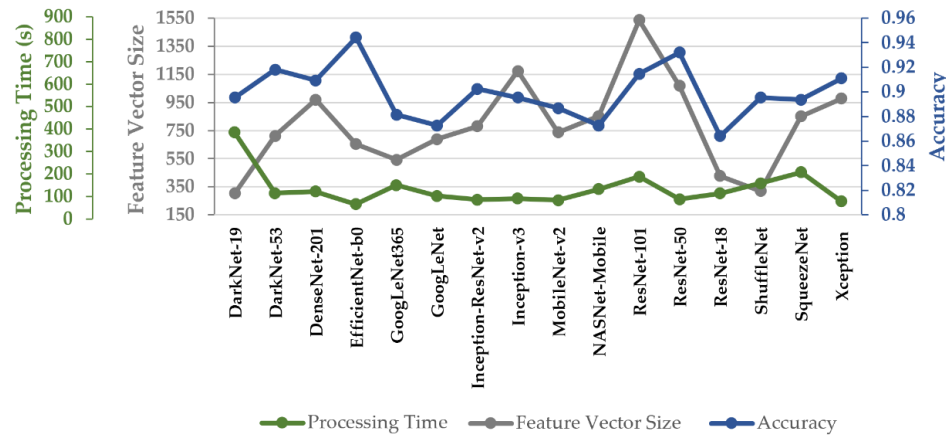

(e)

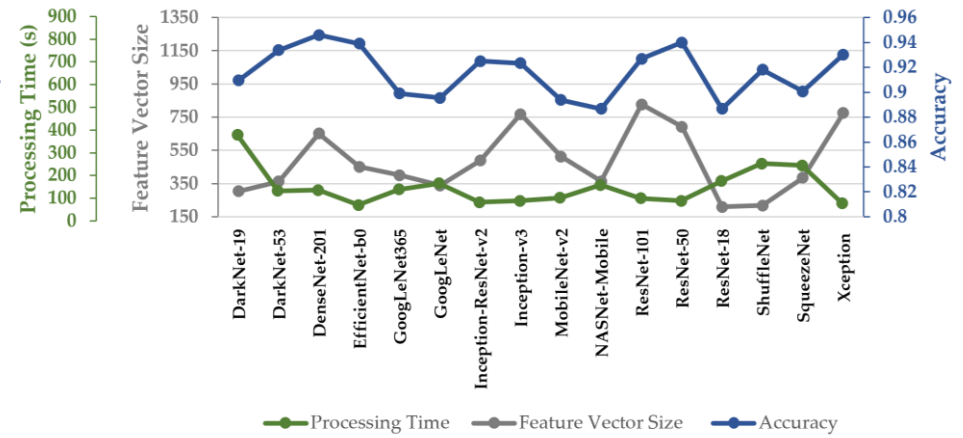

(f)

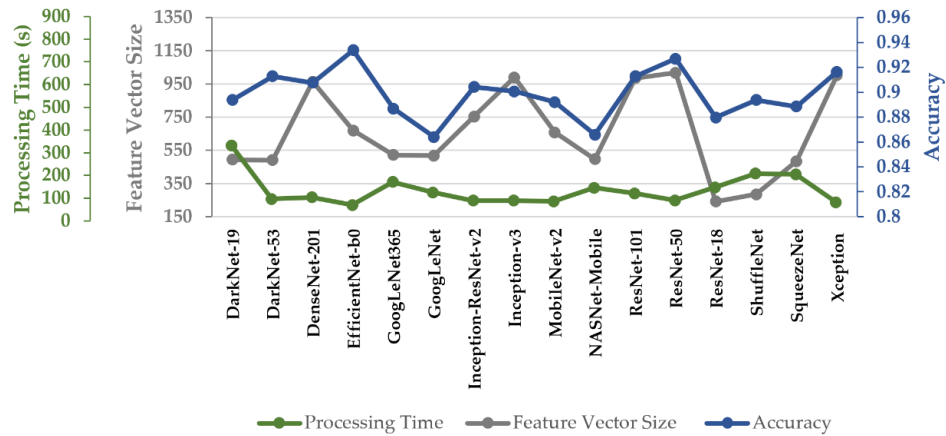

(g)

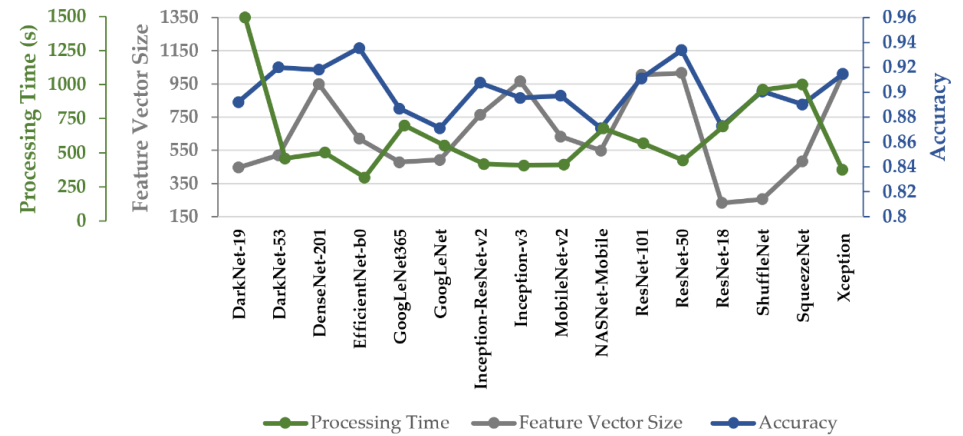

(h)

**Figure S1.** Detailed results of all the networks and the optimization algorithms in terms of accuracy, feature vector size, and processing time: **a)** MPA; **b)** ASOA; **c)** HHOA; **d)** BOA; **e)** WOA; **f)** GWOA; **g)** BA; **h)** FA
